# Supplementary material
Source: MDPI journal article supplement (https://www.mdpi.com/1424-8247/15/6/661)
Supplement: s1 [file s1]

Table S1 – Total count of leukocytes in blood of rats treated with flavancin

| Groups             | day during treatment |              | day post treatment |              |              |              |              |
|--------------------|----------------------|--------------|--------------------|--------------|--------------|--------------|--------------|
|                    | 1                    | 7            | 1                  | 5            | 10           | 20           | 30           |
|                    | male                 |              |                    |              |              |              |              |
| Σ LD <sub>50</sub> | 12.95 ± 4.05         | 12.22 ± 3.18 | 9.12 ± 1.73        | 11.43 ± 3.50 | 12.19 ± 3.92 | 11.54 ± 3.31 | 10.87 ± 3.90 |
| Σ MTD              | 11.40 ± 4.05         | 12.48 ± 0.99 | 12.59 ± 2.81       | 9.41 ± 2.43  | 9.85 ± 4.85  | 11.47 ± 3.54 | 9.54 ± 3.65  |
| Control            | 12.07 ± 3.73         | 12.06 ± 3.72 | 12.48 ± 3.17       | 11.52 ± 3.09 | 11.09 ± 2.87 | 13.02 ± 4.58 | 9.89 ± 3.31  |
|                    | female               |              |                    |              |              |              |              |
| Σ LD <sub>50</sub> | 11.99 ± 2.90         | 11.05 ± 2.76 | 14.57 ± 2.68       | 13.40 ± 2.85 | 10.58 ± 3.15 | 11.38 ± 3.95 | 12.58 ± 3.28 |
| Σ MTD              | 10.80 ± 3.17         | 12.13 ± 2.55 | 11.08 ± 2.97       | 11.46 ± 3.21 | 12.17 ± 3.12 | 12.37 ± 3.31 | 13.04 ± 2.90 |
| Control            | 11.96 ± 4.16         | 12.55 ± 1.74 | 12.19 ± 2.66       | 9.89 ± 1.45  | 11.53 ± 3.83 | 8.84 ± 4.02  | 11.24 ± 3.22 |

Table S2 – Clinical biochemistry parameters of blood serum of rats treated with flavancin intraperitoneally

| Groups             | ALT                   | AST          | alkaline phosphatase | bilirubin total | bilirubin direct | creatinine  | blood urea nitrogen | albumin    | total protein |
|--------------------|-----------------------|--------------|----------------------|-----------------|------------------|-------------|---------------------|------------|---------------|
|                    | day 1 post treatment  |              |                      |                 |                  |             |                     |            |               |
| Σ LD <sub>50</sub> | 117.3 ± 23.9          | 175.9 ± 9.5  | 112.4 ± 34.1         | 10.2 ± 0.8      | 4.1 ± 0.8        | 81.4 ± 10.9 | 9.8 ± 1.0           | 37.9 ± 1.6 | 71.7 ± 5.6    |
| Σ MTD              | 100.5 ± 22.6          | 154.9 ± 17.7 | 111.3 ± 26.1         | 11.2 ± 1.6      | 5.6 ± 3.9        | 69.3 ± 4.1  | 8.1 ± 1.0           | 39.5 ± 1.1 | 72.5 ± 4.2    |
| Control            | 111.1 ± 11.5          | 163.0 ± 12.6 | 104.7 ± 20.0         | 11.8 ± 0.8      | 4.9 ± 1.9        | 69.3 ± 8.7  | 7.1 ± 2.6           | 39.2 ± 1.6 | 73.5 ± 5.6    |
|                    | day 30 post treatment |              |                      |                 |                  |             |                     |            |               |
| Σ LD <sub>50</sub> | 87.8 ± 11.9           | 133.2 ± 15.6 | 103.1 ± 17.3         | 8.2 ± 1.5       | 2.2 ± 0.6        | 80.8 ± 6.2  | 6.1 ± 0.6           | 40.1 ± 1.5 | 76.4 ± 3.0    |
| Σ MTD              | 108.5 ± 22.4          | 133.6 ± 15.8 | 117.8 ± 26.8         | 9.9 ± 0.8       | 2.5 ± 0.8        | 77.8 ± 16.2 | 7.2 ± 0.8           | 40.5 ± 1.4 | 73.2 ± 3.7    |
| Control            | 111.9 ± 17.8          | 143.0 ± 33.2 | 131.2 ± 13.1         | 8.9 ± 0.7       | 2.5 ± 0.9        | 88.5 ± 8.8  | 5.2 ± 1.1           | 40.8 ± 1.1 | 77.8 ± 6.4    |

Table S3 – Electrocardiographic parameters of rats treated with flavancin intraperitoneally

| Groups             | day 1 post treatment |               |               |              | day 30 post treatment |               |               |             |
|--------------------|----------------------|---------------|---------------|--------------|-----------------------|---------------|---------------|-------------|
|                    | Pulse rate/ min      | QT/sec        | RR/sec        | QT %         | Pulse rate/ min       | QT/sec        | RR/sec        | QT %        |
|                    | male                 |               |               |              |                       |               |               |             |
| Control            | 394.15 ± 46.8        | 0.049 ± 0.01  | 0.152 ± 0.02  | 32.17 ± 4.12 | 378.42 ± 61.3         | 0.065 ± 0.02  | 0.158 ± 0.01  | 41.3 ± 5.4  |
| Σ MTD              | 418.23 ± 38.3        | 0.052 ± 0.01  | 0.143 ± 0.01  | 36.3 ± 3.18  | 384.39 ± 43.7         | 0.071 ± 0.01  | 0.156 ± 0.01  | 45.6 ± 9.2  |
| Σ LD <sub>50</sub> | 396.51 ± 43.9        | 0.063 ± 0.01  | 0.151 ± 0.03  | 42.02 ± 4.32 | 398.6 ± 37.7          | 0.066 ± 0.02  | 0.151 ± 0.02  | 43.8 ± 7.3  |
|                    | female               |               |               |              |                       |               |               |             |
| Control            | 404.0 ± 13.5         | 0.049 ± 0.00  | 0.149 ± 0.01  | 32.5 ± 3.5   | 412.1 ± 11.8          | 0.049 ± 0.004 | 0.146 ± 0.01  | 33.4 ± 2.78 |
| Σ MTD              | 378.6 ± 13.9         | 0.047 ± 0.004 | 0.159 ± 0.006 | 29.4 ± 3.0   | 396.3 ± 18.2          | 0.047 ± 0.002 | 0.152 ± 0.012 | 31.2 ± 3.7  |
| Σ LD <sub>50</sub> | 412.2 ± 51.6         | 0.042 ± 0.007 | 0.147 ± 0.018 | 29.4 ± 6.9   | 407.5 ± 21.4          | 0.044 ± 0.003 | 0.147 ± 0.014 | 30.1 ± 2.4  |

Table S4 – Clinical urine analysis of rats treated with flavancin intraperitoneally

| Groups             | RBS                   | WBS  | Bilirubin μmol/l | Urobilinogen μmol/L | Ketones mmol/L | glucose mmol/L | pH        | Protein (g/l) | Specific weight |
|--------------------|-----------------------|------|------------------|---------------------|----------------|----------------|-----------|---------------|-----------------|
|                    | day 1 post treatment  |      |                  |                     |                |                |           |               |                 |
|                    | male                  |      |                  |                     |                |                |           |               |                 |
| Σ LD <sub>50</sub> | negative              | 0–5  | negative         | negative            | negative       | negative       | 6.5 ± 0.6 | 0–0.3         | 1.025–1.03      |
| Σ MTD              | negative              | 0–5  | negative         | negative            | negative       | negative       | 6.7 ± 0.3 | ≤ 0.3         | 1.03–1.035      |
| Control            | negative              | 0–5  | negative         | negative            | negative       | negative       | 6.6 ± 0.4 | ≤ 0.3         | 1.02–1.025      |
|                    | female                |      |                  |                     |                |                |           |               |                 |
| Σ LD <sub>50</sub> | negative              | 0–10 | negative         | negative            | negative       | negative       | 6.5 ± 0.3 | 0.3 – 0.5     | 1.025–1.029     |
| Σ MTD              | negative              | 0–5  | negative         | negative            | negative       | negative       | 6.4 ± 0.2 | ≤ 0.3         | 1.026–1.031     |
| Control            | negative              | 0–5  | negative         | negative            | negative       | negative       | 6.5 ± 0.2 | ≤ 0.3         | 1.02–1.027      |
|                    | day 30 post treatment |      |                  |                     |                |                |           |               |                 |
|                    | male                  |      |                  |                     |                |                |           |               |                 |
| Σ LD <sub>50</sub> | negative              | 0–5  | negative         | negative            | negative       | negative       | 6.6 ± 0.4 | ≤ 0.3         | 1.02–1.025      |
| Σ MTD              | negative              | 0–5  | negative         | negative            | negative       | negative       | 6.7 ± 0.2 | ≤ 0.3         | 1.015–1.02      |
| Control            | negative              | 0–5  | negative         | negative            | negative       | negative       | 6.7 ± 0.3 | ≤ 0.3         | 1.02–1.025      |
